# Supplementary material
Source: publisher figshare collection journal article supplement (https://gsajournals.figshare.com/ndownloader/files/13297310)
Supplement: Supplementary file 1 [file 13297310]

## Sheet: Sheet1
Table S4. The top 20 GO categories of commonly expressed "dosage sensitive" genes
Term	Gene count	%	P-Value	Genes
GO:0016180~snRNA processing	12	0.401204	9.55484e-08	INTS9, CPSF3L, INTS8, INTS5, INTS4, INTS7, INTS6, INTS1, INTS2, INTS12, INTS3, INTS10
GO:0007030~Golgi organization	23	0.768974	9.22348e-07	CSNK1A1, ARL1, ATL2, HTT, ARHGEF7, ATL3, HACE1, LMAN1, ARFGEF1, GAK, KIFC3, BAG5, ARHGAP21, COG3, BLZF1, FBXW8, CSNK1D, GORASP1, DYM, CLASP1, BCAS3, GOLGA5, COG2
GO:0015991~ATP hydrolysis coupled proton transport	17	0.568372	1.67457e-06	ATP6V0E1, ATP5B, ATP6AP1, ATP6V1H, ATP5G2, ATP5G1, ATP6V1B2, ATP5G3, ATP6V0B, ATP6V1F, ATP6V1C1, ATP6V1A, ATP6V1E1, ATP6V0A1, ATP5A1, ATP6V0D1, ATP6V0A2
GO:0006457~protein folding	35	1.17018	2.00479e-06	HSP90AB1, FKBP9, GRPEL2, GRPEL1, FKBP8, FKBP7, FKBP3, FKBP1A, CCT2, CCT3, CALR, CANX, DNAJB11, DNAJA1, DNAJA3, DNAJC1, HSPA9, HSP90AA1, CWC27, AARS, CCT6A, CLPX, CCT7, ERP44, CCT5, HSP90B1, CCT4, CCT8, FKBP14, FKBP15, DNAJB1, DNAJB4, FKBP11, DNAJB6, FKBP2
GO:0006446~regulation of translational initiation	13	0.434637	4.32103e-06	EIF4G1, EIF3D, EIF3B, EIF3G, EIF3E, EIF3F, EIF5, EIF4A1, EIF3K, EIF5B, EIF1, EIF3M, CTIF
GO:0016192~vesicle-mediated transport	30	1.00301	6.1118e-06	COPA, CLTA, AP1M1, CLTB, AP1G2, AP1B1, AP4E1, AP1G1, AP2S1, COPZ1, CLTC, COPB2, AP2B1, AP1S2, COPB1, JAGN1, CLINT1, AP2M1, GOLT1B, CHMP1A, AP2A2, COPG1, ARF1, KXD1, AP2A1, GOSR2, GGA1, AP4B1, GGA2, GGA3
GO:0015986~ATP synthesis coupled proton transport	11	0.36777	2.4606e-05	ATP5D, ATP5B, ATP5F1, ATP5L, ATP5G2, ATP5O, ATP5A1, ATP5G1, ATP5H, ATP5G3, ATP5J
GO:0010388~cullin deneddylation	8	0.267469	5.32156e-05	GPS1, COPS2, COPS5, COPS6, COPS3, COPS4, COPS7A, COPS8
GO:0070059~intrinsic apoptotic signaling pathway in response to endoplasmic reticulum stress	12	0.401204	8.29262e-05	BAK1, ATF4, DAB2IP, BAG6, ERO1A, AIFM1, BAX, GSK3B, DNAJC10, ERN1, APAF1, DDIT3
GO:0001731~formation of translation preinitiation complex	9	0.300903	0.000142271	EIF3D, EIF3G, EIF3H, EIF3E, EIF3F, EIF3K, DENR, EIF3M, EIF2D
GO:0006890~retrograde vesicle-mediated transport, Golgi to ER	10	0.334336	0.00022192	COG3, KIF1C, COG7, GBF1, HTT, ARF4, ARCN1, LMAN2, ERGIC2, COPE
GO:0006891~intra-Golgi vesicle-mediated transport	7	0.234035	0.000250492	COG3, COPG2, COG5, COG6, COPZ1, COG1, COG2
GO:0008625~extrinsic apoptotic signaling pathway via death domain receptors	12	0.401204	0.000302375	DDX47, DAB2IP, CASP8AP2, DDX3X, BLOC1S2, BAG3, BAX, DEDD, KIAA0141, BAD, DEDD2, DAPK1
GO:0034314~Arp2/3 complex-mediated actin nucleation	9	0.300903	0.000356597	ARPC1A, ACTR3, ARPC1B, ACTR2, ARPC3, ARPC5L, ARPC4, ARPC5, JMY
GO:0006886~intracellular protein transport	44	1.47108	0.000462886	COPA, CLTA, AP1M1, CLTB, AP1G2, AP4E1, AP1B1, AP1G1, AP2S1, COPZ1, AP3S1, CLTC, KIF13A, COPB2, AP1S1, CTTN, AP2B1, AP1S2, ACD, CSE1L, AP3M1, COPB1, CHM, BCAP29, AP3D1, AP2M1, ASPSCR1, IPO9, ARFIP1, IPO8, CDK5, BCAP31, COG3, AP2A2, COPG2, COPG1, CHML, COG7, AP2A1, IPO4, GGA1, AP4B1, GGA2, GGA3
GO:0030968~endoplasmic reticulum unfolded protein response	13	0.434637	0.000512051	ATF6, HERPUD1, DERL2, DERL1, ERO1A, ATF6B, AARS, CREB3L2, CDK5RAP3, AMFR, EIF2AK2, EIF2AK3, DDIT3
GO:0043928~exonucleolytic nuclear-transcribed mRNA catabolic process involved in deadenylation-dependent decay	6	0.200602	0.00115607	CNOT8, EXOSC9, EXOSC5, EXOSC3, CNOT7, CNOT6
GO:0034453~microtubule anchoring	8	0.267469	0.00129081	FOPNL, CEP57, CEP350, CEP57L1, FGFR1OP, DAG1, CLASP1, GCC2
GO:0042384~cilium assembly	26	0.869274	0.00266673	ABLIM1, IQCB1, CEP83, E2F4, BBS9, B9D1, DYNC2LI1, CEP41, ALMS1, CEP164, KIAA0586, CBY1, ATP6V1D, FLNA, ACTR2, ICK, BBIP1, IFT46, FNBP1L, ATXN10, IFT20, LAMA5, IFT172, FAM161A, EXOC5, EHD1
%: percent of total commonly expressed "dosage sensitive" genes
